# Supplementary figures and images for: Large-scale synthesis of colloidal bowl-shaped particles
Source: Royal Society of Chemistry journal article supplement (doi:10.1039/d0sm00793e), 2021-01-01

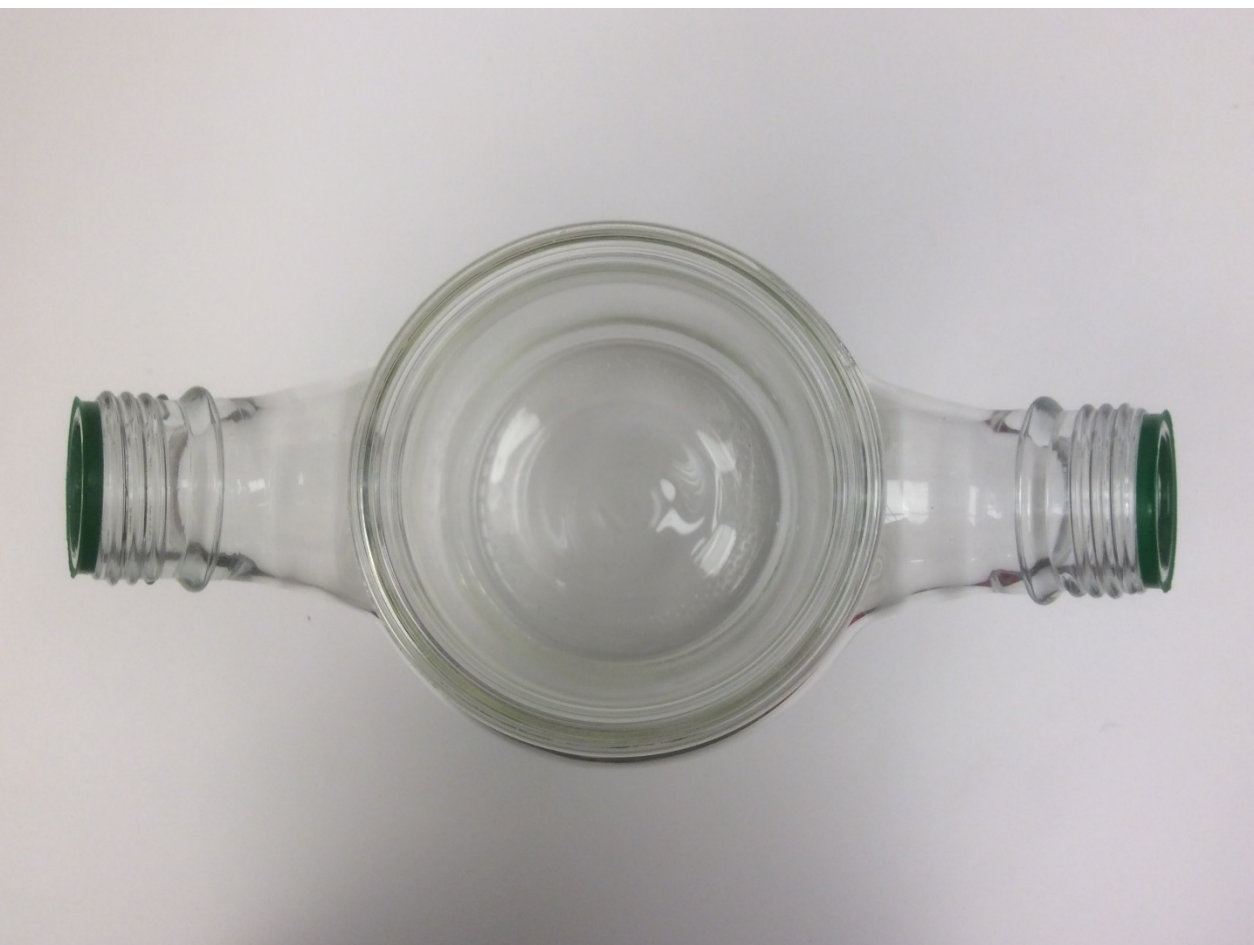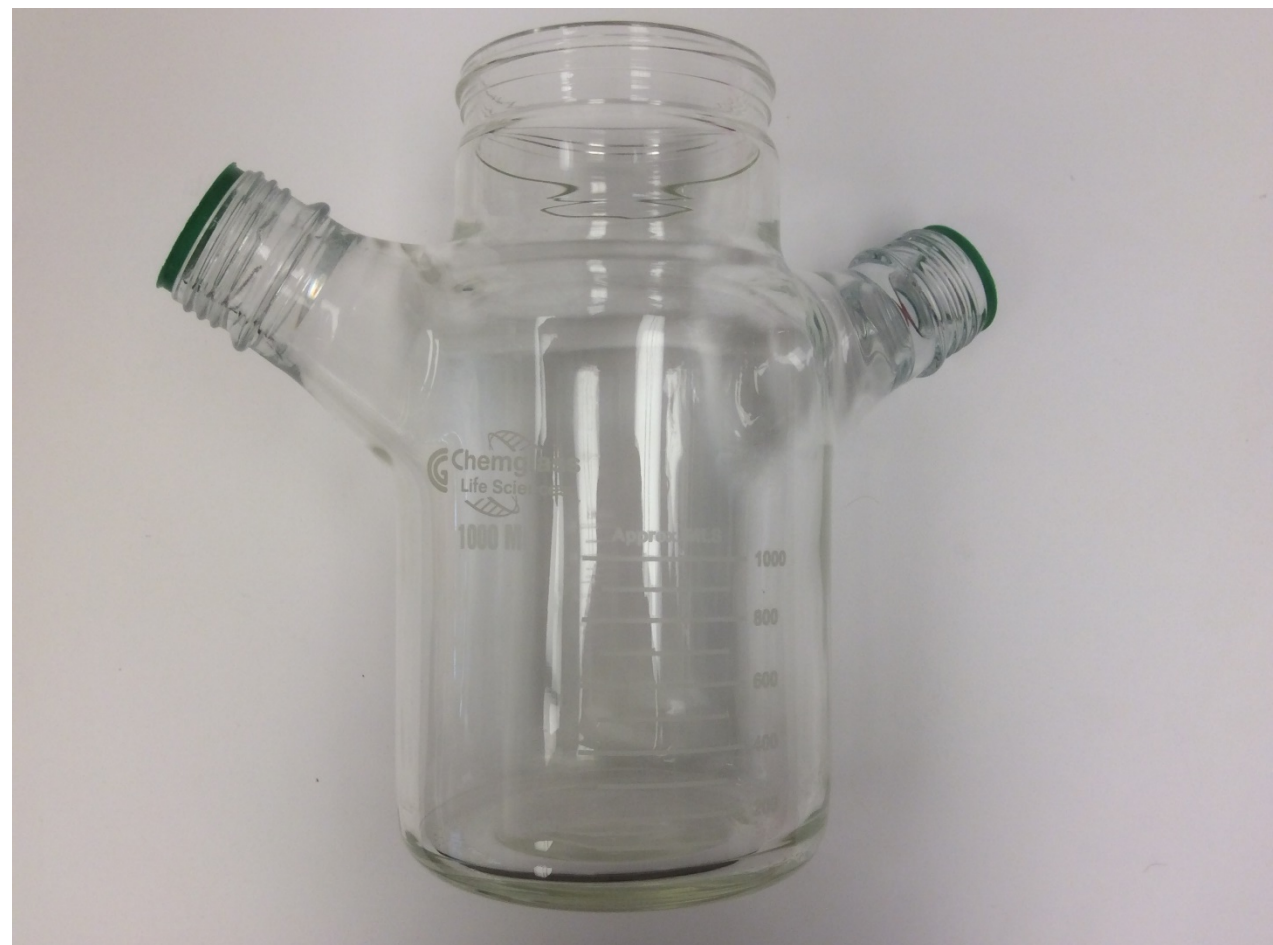

1 liter spinner flask

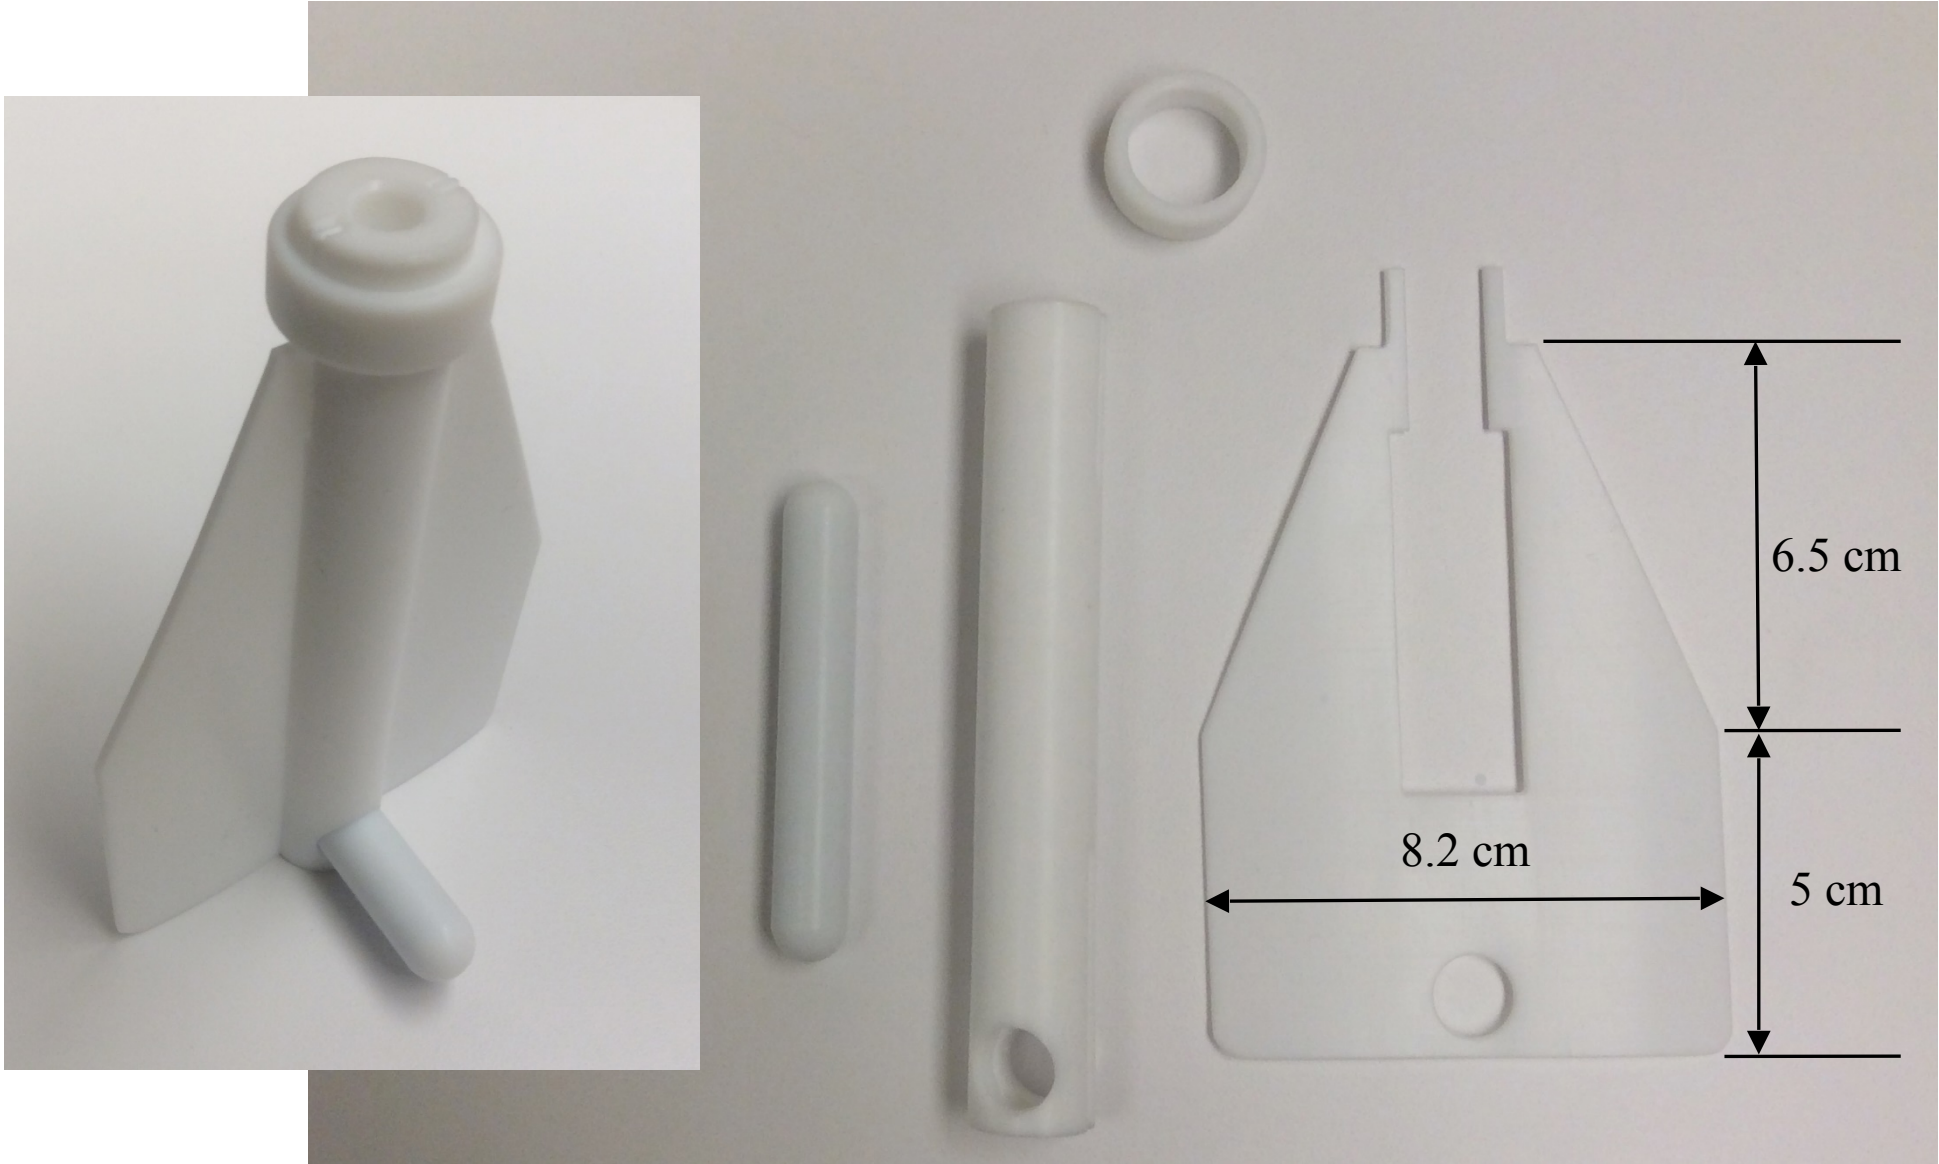

"stretch" impeller design

Supplement: d0sm00793e6.pdf [file d0sm00793e6.pdf]
